# Supplementary material for: Identification of a novel long non-coding RNA within RUNX1 intron 5
Source: Hum Genomics. 2019 Jul 31;13:33. doi: 10.1186/s40246-019-0219-1 (PMC6670153; doi:10.1186/s40246-019-0219-1)
Supplement: Supplementary file 2 — Table S2. Presence of DNaseI hypersensitivity along RUNX1 intron 5 and control regions, in 124 cell types. (XLSX 23 kb) [file 40246_2019_219_MOESM2_ESM.xlsx]

## Sheet: Hoja1
	DNaseI hypersensitivity hotspot analysis
	RUNX1 intron 5										Region surrounding the TSS of SNRPD3 gene				Gene free region from chromosome 1										BCR gene M-BCR
Cell type	5'-I	II	III	IV	V	VI	VII	VIII	IX	X-3'	5'-I	II	III	IV-3'	5'-I	II	III	IV	V	VI	VII	VIII	IX	X-3'	5'-I	II	III-3'
8988T
A549
Adult CD4+ Th0
Adult CD4+ Th1
AG04449
AG04450
AG09309
AG09319
AG10803
AoAF
AoSMC
B cells CD20+ RO01778
BE2 C
BJ
Bone Marrow HS5
Bone Marrow MS27a
Bone Marrow MSC
Caco-2
CD34+ Mobilized
CD34+ Naive Wb11970640
CD34+ Naive Wb78495824
Cerebellum
Cerebrum frontal OC
Chorion
CLL
CMK
Colo829
ECC-1
Fibrobl
Fibrobl GM03348
FibroP
Frontal cortex OC
GC B cell
Gliobla
GM06990
GM10248
GM10266
GM12864
GM12865
GM12878
GM12891
GM12892
GM13976
GM18507
GM19238
GM19239
GM19240
GM20000
H1-hESC
H7-hESC
H9ES
HA-h
HA-sp
Hac
HAEpic
HBMEC
HBVP
HBVSCM
HCF
HCFaa
HCM
HConF
HCPEpic
HCT-116
Heart OC
HEK293T
HeLa-S3
Hepatocytes
HepG2
HFF
HGF
HIPEpic
HL-60
HMEC
HMF
HMVEC-dAd
HPAEC
HPAF
HPDE6-E6E7
HPdLF
HPF
HRCEpic
HRE
HRGEC
HRPEpic
HSMM
HSMM emb
HSMMtube
Huh-7
HUVEC
IMR90
Ishikawa
Jurkat
K562
LHCN-M2
LNCaP
MCF-7
Medullo
Mel 2183
Melano
Monocytes CD14+
Naive B cell
NB4
NH-A
NHLF
Olf neurosphere
Osteoblasts
PANC-1
PanIslets
pHTE
PrEC
RPTEC
RWPE1
SAEC
SK-N-MC
SK-N-SH
SKMC
Stellate
T-47D
Th1
Th2
Urothelia
WERI-Rb-1
WI-38
